1 **Temporal Multivariate Pattern Analysis (tMVPA): a single trial**  
2 **approach exploring the temporal dynamics of the BOLD**  
3 **signal.**

4  
5 Luca Vizioli <sup>1</sup>, Alexander Bratch <sup>1,2</sup>, Junpeng Lao <sup>3</sup>, Kamil Ugurbil<sup>1</sup>, Lars Muckli <sup>4</sup>, Essa Yacoub <sup>1</sup>

6  
7 <sup>1</sup> Center for Magnetic Resonance Research (CMRR), University of Minnesota, Minneapolis,  
8 Minnesota, U.S.

9 <sup>2</sup> Department of Psychology, University of Minnesota, Minneapolis, Minnesota, U.S.

10 <sup>3</sup> Department of Psychology, University of Fribourg, Fribourg, Switzerland.

11 <sup>4</sup> Institute of Neuroscience and Psychology, University of Glasgow, Glasgow, Scotland, UK.

12

13

14

15

16 Corresponding Author:

17 Luca Vizioli

18 Centre for Magnetic Resonance Research

19 Department of Radiology

20 University of Minnesota

21 2021 6<sup>th</sup> street SE,

22 55455 Minneapolis, MN,

23 United States.

## 24 **Abstract**

25 *Background.* fMRI provides spatial resolution that is unmatched by any non-invasive  
26 neuroimaging technique. Its temporal dynamics however are typically neglected due to the  
27 sluggishness of the hemodynamic based fMRI signal.

28 *New Methods.* We present *temporal multivariate pattern analysis* (tMVPA), a method for  
29 investigating the temporal evolution of neural representations in fMRI data, computed using  
30 pairs of single-trial BOLD time-courses, leveraging both spatial and temporal components of the  
31 fMRI signal. We implemented an expanding sliding window approach that allows identifying the  
32 time-window of an effect.

33 *Results.* We demonstrate that tMVPA can successfully detect condition-specific multivariate  
34 modulations over time, in the absence of univariate differences. Using Monte Carlo simulations  
35 and synthetic data, we quantified family-wise error rate (FWER) and statistical power. Both at  
36 the group and at the single subject level, FWER was either at or significantly below 5%. For the  
37 group level, we reached the desired power with 18 subjects and 12 trials; for the single subject  
38 scenario, 14 trials were required to achieve comparable power.

39 *Comparison with existing methods.* tMVPA adds a temporal multivariate dimension to the tools  
40 available for fMRI analysis, enabling investigations of the evolution of neural representations  
41 over time. Moreover, tMVPA permits performing single subject inferential statistics by  
42 considering single-trial distribution.

43 *Conclusion.* The growing interest in fMRI temporal dynamics, motivated by recent evidence  
44 suggesting that the BOLD signal carries temporal information at a finer scale than previously  
45 thought, advocates the need for analytical tools, such as the tMVPA approach proposed here,  
46 tailored to investigating BOLD temporal information.

47

48 Key Words: Multivariate; Univariate; temporal analysis; BOLD; MVPA

## 49 Introduction

50 Over the past quarter century, functional Magnetic Resonance Imaging (fMRI) has  
51 become one of the most powerful non-invasive tools for investigating human neural processing.  
52 By exploiting the coupling between oxygenated blood flow and neuronal firing (Goense &  
53 Logothetis, 2008; Logothetis, N. K., Pauls, J., Augath, M., Trinath, T., & Oeltermann, 2001; S  
54 Ogawa et al., 1993), fMRI infers cortical activity by measuring changes in the Blood Oxygen  
55 Level Dependent (BOLD) signal (Goense & Logothetis, 2008; Logothetis, N. K., Pauls, J.,  
56 Augath, M., Trinath, T., & Oeltermann, 2001; S Ogawa et al., 1993). The sluggish nature of the  
57 hemodynamic based BOLD signal (requiring several seconds to peak following stimulus  
58 presentation(Boynton et al., 1996; S Ogawa et al., 1993)), paired with the high spatial precision  
59 of fMRI recordings, has resulted in a focus on BOLD spatial information in most applications,  
60 neglecting any temporal dynamics. More recently, developments in fMRI pulse sequences,  
61 allowing significant increases in temporal resolution (Feinberg, D. A., Moeller, S., Smith, S. M.,  
62 Auerbach, E., Ramanna, S., Glasser, M. F., ... & Yacoub, 2010; Moeller et al., 2010) that have  
63 been thus far primarily exploited to improve statistical power in fMRI analysis, offer the  
64 possibility of resolving temporal dynamics that were previously elusive.

65 While focus has been primarily on the spatial domain of the BOLD signal, this is not to  
66 say that the fMRI temporal domain has been entirely ignored. For example, several attempts  
67 have been made to target local stimulus-distinct characteristics of the BOLD time series.  
68 Specifically, these investigations have sought to understand stimulus-specific temporal effects in  
69 the context of decision making (Mcguire & Kable, 2015), auditory (Baumann et al., 2010), and  
70 semantic and visual processing (Avossa et al., 2003; Bailey et al., 2013; Formisano et al., 2002;  
71 Gentile et al., 2017; Siero, J.C., Petridou, N., Hoogduin, H., Luijten, P.R., Ramsey, 2011; Vu,  
72 A.T., Phillips, J.S., Kay, K., Phillips, M.E., Johnson, M.R., Shinkareva, S.V., Tubridy, S., Millin,  
73 R., Grossman, M., Gureckis, T., Bhattacharyya, R., Yacoub, 2016). In conjunction, animal

74 studies have sought to understand the precise relationship between the BOLD temporal  
75 dynamics and the neural activity elicited from such domains (Silva & Koretsky, 2002; Yen et al.,  
76 2018). Additionally, it is worth noting that a variety of both high complexity and real world stimuli  
77 operate at the temporal resolution available to fMRI. For example, in the visual domain, a  
78 number of visual illusions are characterized by their slowly transforming, bi-stable nature (Ernst  
79 & Bu, 2004; Schrater et al., 2004). Furthermore, biological motion (Johansson, 1973; Maier et  
80 al., 2008; Troje, 2002) and other motion-based complex stimuli (Ball & Sekuler, 1982; Shadlen  
81 & Newsome, 1998) are typically presented over large temporal windows. BOLD latency  
82 measurements have likewise been shown to be relevant in the auditory and multisensory  
83 domain, where, for example, phonemic boundaries shift across temporal gradients when  
84 presented in isolation (Lee et al., 2012) or within specific visual contexts (Gribble, 1996).  
85 Moreover, analyses of neural responses to any long duration stimuli, such as film or real-world  
86 dynamic scenes, necessitate a technique that directly measures the temporal evolution of the  
87 BOLD signal.

88         Importantly, a number of studies have more recently suggested that fMRI may carry  
89 neuronal information at a much faster temporal scale than previously (Lewis et al., 2016; Siero,  
90 J.C., Petridou, N., Hoogduin, H., Luijten, P.R., Ramsey, 2011; Vu, A.T., Phillips, J.S., Kay, K.,  
91 Phillips, M.E., Johnson, M.R., Shinkareva, S.V., Tubridy, S., Millin, R., Grossman, M., Gureckis,  
92 T., Bhattacharyya, R., Yacoub, 2016). Siero and colleagues (Siero, J.C., Petridou, N.,  
93 Hoogduin, H., Luijten, P.R., Ramsey, 2011), for example, indicated that neurovascular coupling  
94 takes place on a shorter timescale than had been previously reported in the human brain.  
95 Moreover, Lewis and colleagues (Lewis et al., 2016) have suggested that, due to recent  
96 advances in MR hardware and software as well as analytical strategies, fMRI can measure  
97 neural oscillations up to 1 Hz. Additionally, Vu and colleagues (Vu, A.T., Phillips, J.S., Kay, K.,  
98 Phillips, M.E., Johnson, M.R., Shinkareva, S.V., Tubridy, S., Millin, R., Grossman, M., Gureckis,  
99 T., Bhattacharyya, R., Yacoub, 2016) successfully demonstrated that with the use of multivoxel

100 pattern analysis (MVPA), it is possible to extract word timing information with fast TRs (i.e. 500  
101 ms). Along the same lines, in an visual illusion experiment, Edwards and colleagues (Edwards  
102 et al., 2017) showed that as little as 32 ms difference in stimulus presentation is reliably  
103 detected in the BOLD time-course.

104         These observations highlight the growing interest in the temporal dynamics of the BOLD  
105 signal. However, to fully exploit the potential neuro-temporal information carried by the BOLD  
106 time-course, MR hardware and software (e.g. pulse sequences) developments have to be  
107 paired with suitable analytical tools that maximize the sensitivity to BOLD temporal information.  
108 Thus far, the majority of temporal analyses have only examined univariate temporal differences  
109 between stimuli or stimulus conditions (i.e., latency differences on average amplitude). While  
110 such data is useful for understanding the propagation of neural activation throughout the brain  
111 as a function of time, it fails to capture the representational content as conveyed by multivariate  
112 patterns as well as how these representations transform over time. Multivariate approaches to  
113 analyzing fMRI data offer a different, albeit complementary outlook on the neural information  
114 carried by the BOLD signal (Kriegeskorte & Bandettini, 2007). It has been suggested that  
115 multivoxel pattern analysis, or MVPA (Haxby et al., 2001; Kamitani & Tong, 2005), has the  
116 ability to optimally probe neuronal information existing in voxel populations with conventional  
117 fMRI methods (Carlson et al., 1999; Cox & Savoy, 2003; Haxby et al., 2005; Kriegeskorte &  
118 Bandettini, 2007; Strother et al., 2002). Even at 3T, where voxels traditionally measure 2-3 mm  
119 isotropic resolutions, MVPA can successfully extract neural information – such as orientation  
120 preference (Kamitani & Tong, 2005) – which exists at a much finer spatial scale than the  
121 resolution of single voxels. These approaches are believed to increase the sensitivity to such  
122 fine-grained information present in lower resolution images by exploiting the micro-feature-  
123 selective biases of single voxels that stem from the variability of the distribution of cortical  
124 columns or their vascular architecture (Beeck, 2010; Freeman et al., 2011; Kamitani & Tong,  
125 2005; D J Mannion et al., 2009; Damien J Mannion et al., 2015; Sasaki et al., 2006).

126           Inspired by the demonstrated fine sensitivity of MVPA to finer scale spatial information,  
127 here we apply multivariate analysis to BOLD time-courses in order to maximize sensitivity to  
128 neuro-temporal information. Capitalizing on the growing interest surrounding the temporal  
129 domain of fMRI, we propose a method that captures the temporal characteristics of the BOLD  
130 signal at the multi-voxel pattern level. The method, first introduced in Ramon et al. (Ramon et  
131 al., 2015), consists of probing single trial events to investigate how the associated  
132 representational pattern of activity (Kriegeskorte et al., 2008; Kriegeskorte & Kievit, 2013) for a  
133 given stimulus evolves over time. This enables the creation of Single Trial Representational  
134 Dissimilarity Matrices (stRDMs), which allows assessing the temporal evolution of the  
135 (dis)similarity of these activity patterns.

136           As previously shown on real data (Ramon et al., 2015), here we demonstrate on  
137 synthetically generated data that our approach can detect multivariate differences over time in  
138 the *absence of univariate* amplitude modulations across conditions. As such, our temporal  
139 multivoxel pattern analysis (tMVPA) offers a different albeit potentially complementary approach  
140 to examining BOLD temporal dynamics. We further present a sliding window statistical analysis  
141 of these stRDMs that allows quantifying the precise temporal window displaying the effect of  
142 interest. We estimate the power and sensitivity of the technique using Monte Carlo simulations.

143

## 144 **Methods**

### 145 **Procedure and MRI acquisition**

146 Note that the acquired data were used as a starting point to generate synthetic data with  
147 realistic signal properties. Thus, within the context of this paper, the original purpose and the  
148 hypothesis of the experiment are irrelevant.

149  
150 *Participants.* 20 healthy right-handed subjects (age range: 18-31) participated in the study. Of  
151 these, 10 were WC (5 females; mean age, 24) and 10 were EA (4 females; mean age, 22).  
152 Three participants (1 WC 2 EA) were excluded from the analysis due to excessive motion during  
153 scanning (details below). All subjects had normal, or corrected vision and provided written  
154 informed consent. The ethical committee of College of Medical, Veterinary and Life Sciences at  
155 the University of Glasgow approved the experiments.

156  
157 *Stimuli and procedure.* The experimental procedure consisted of a standard block design face  
158 localizer and a simple slow event-related face paradigm. All visual stimuli used for the face  
159 localizer consisted of front-view gray scale photographs depicting 20 different faces (5 identities  
160 × 2 genders × 2 races, taken from the JACFEE database (Matsumoto, D., & Ekman, 1988)),  
161 houses (Husk et al., 2007) and textures of noise, respectively. Noise texture stimuli were created  
162 by combining the mean amplitude spectrum across faces and houses with random phase  
163 spectra sampled from a Gaussian distribution, thereby lending them to contain the same  
164 amplitude spectrum as the face and house stimuli. For the main slow event-related experiment,  
165 a different set of images used in previous studies (Michel et al., 2006) was utilized which also  
166 consisted of 20 front-view gray scale photographs of WC and EA (again 5 identities × 2 genders

167 × 2 races). All images subtended approximately  $3.75 \times 4.25^\circ$  of visual angle. Face stimuli were  
168 cropped to remove external features; none had particularly distinctive features and male faces  
169 were clean-shaven. The stimuli were centered in a 52 x 52 cm background of average  
170 luminance (25.4 cd/m<sup>2</sup>, 23.5-30.1). All images were equated in terms of luminance, contrast and  
171 spatial frequency content by taking the average of the amplitude spectra of all stimuli and  
172 combining that average spectrum with the original phase spectra to reconstruct each individual  
173 stimulus. The root mean square contrast (i.e. the standard deviation of the pixel intensities) was  
174 also kept constant across stimuli. Stimuli were projected from the back of the scanner on a  
175 round screen situated in the scanner tunnel and occupying the whole width of the tunnel (i.e. 60  
176 cm of diameter). Participants viewed the images through a mirror placed on the head coil.

177 All participants completed two runs of the block design face localizer fMRI experiment to  
178 define the areas responding preferentially to faces (~12 min/run), and three runs of the main  
179 event-related design experiment aimed at measuring the neural activity elicited by individual SR  
180 and OR identities (~16 min/run).

181  
182 *Face localizer.* Face localizer runs involved presentation of blocks of WC or EA faces, houses  
183 and noise textures. Each run began with presentation of black fixation cross displayed on grey  
184 background for 20 sec and consisted of 24 randomly presented blocks of images. Each block (6  
185 blocks/category; separated by a 12 sec fixation) involved presentation of 10 different stimuli  
186 randomly presented for 800 ms, separated by a 400 ms ISI. To minimize attentional confounds  
187 on the BOLD signal related to the race of the stimuli, we implemented an orthogonal task.  
188 Participants were instructed to respond to red or green stimuli which (10% of the images, i.e.  
189 one red or green stimulus per block), by pressing a button on a response pad held in their right  
190 hand.

191



192 *Event-related experiment.* Each run of the event-related face experiment began and ended with  
193 20 seconds fixation and consisted of 80 events (10 identities per race x 2 races x 4 repetitions  
194 per identity). Face stimuli were displayed for 850 ms followed by a 11.15 sec fixation cross;  
195 participants were instructed to maintain fixation on a central fixation cross throughout each 12  
196 sec event. As for the face localizer scans, an orthogonal task was employed with participants  
197 responding to a change in the color of the fixation cross (red or green, for 200-1200 ms at a  
198 random time within an event, before reverting to its original color) by pressing a button.

199  
200 *MRI acquisition protocol.* All MRI data were collected with a 3-T Siemens Tim Trio System with a  
201 32-channel head coil and integrated parallel imaging techniques (IPAT factor: 2). Functional MRI  
202 volumes were collected using an echo-planar acquisition sequence [*localizer runs*: repetition  
203 time (TR), 2000 ms; echo time (TE), 30 ms; field of view (FOV), 210 x 210 mm; flip angle (FA),  
204 77°; 36 axial slices; spatial resolution, 3mm isotropic voxels; *event-related runs*: TR, 1000 ms;  
205 TE, 30 ms; FOV, 210 x 210 mm; FA, 62°; 16–18 axial slices; spatial resolution, 3 × 3 × 4 mm  
206 voxels]. Slices were positioned to maximize coverage of occipito-temporal regions. T1-weighted  
207 anatomical images were obtained using an MPRAGE sequence (192 slices; TR, 1900 ms; FOV,  
208 256 x 256 mm; flip angle, 9°; TE, 2.52 ms; spatial resolution, 1 mm isotropic voxels). For  
209 participants who were re-scanned due to movement artifacts, separate anatomical scans were  
210 recorded for each scanning session to facilitate realignment of the functional data.

211  
212 *MRI data preprocessing.* fMRI data were preprocessed in native space using BrainVoyager QX  
213 version 2.1 (Brain Innovation). Functional images were slice-scan time corrected, three-  
214 dimensional motion corrected with reference to the functional volume taken just before the  
215 anatomical scan, high-pass filtered using a Fourier basis set of three cycles per run (including  
216 linear trend). Images were co-registered with the anatomical set and spatially normalized into

217 Talairach space (Talairach, J., & Tournoux, 1988); images from localizer runs were spatially  
218 smoothed with a full-width at half-maximum of 4 mm.

219  
220 *Functional ROI definition.* Five functional ROIs were identified from the localizer runs. Individual  
221 participants bilateral FFA, bilateral OFA, and right AIT were identified by performing F-tests on  
222 all the voxels in the brain and determining the peak voxel of the activation clusters identified by  
223 the contrast (WC + AC) faces > (Houses +Noise) located in the bilateral fusiform and inferior  
224 occipital gyrus, respectively. To control for type I errors, False positive Discovery Rate (FDR)  
225 was implemented as a multiple comparison correction. The significance threshold was set to  
226  $q < .05$  for all ROIs and participants. The corresponding masks for these ROIs were exported into  
227 MATLAB (MathWorks) for subsequent analyses. Across all participants from both groups (WC  
228 and EA), we identified 86 ROIs in total. While bilateral FFA and right OFA were identified in all  
229 participants, a few subjects did not have a clear definition of left OFA and right AIT. The average  
230 number of voxel across all ROIs was 47.9 (std: 16.7).

231  
232 *BOLD percent signal change and epochs definition.* For each voxel, we computed BOLD  
233 percent signal change by dividing the raw BOLD time course by its mean. We then defined the  
234 epochs of interest as those portions of the whole BOLD time series ranging from 1 TR prior to  
235 14 TRs after stimulus onset. For each single trial we extracted these 15-TR long time-courses  
236 from all the voxels within each ROI of every subject. These BOLD percent signal change  
237 epochs were saved as a matrix that we used to generate synthetic data using Monte Carlo  
238 simulations (details below).

239

## 240 Temporal multivariate pattern analysis (tMVPA)

241 In this paper, we developed a novel multivariate temporal analysis for the BOLD time-  
242 course, inspired by representational similarity analysis (Kriegeskorte & Kievit, 2013). This  
243 approach assesses the temporal evolution of the degree of dissimilarity of neural  
244 representations - defined as the pattern of BOLD response across all voxels - elicited by  
245 different time points (Ramon et al., 2015). It involves computing Single Trial Representational  
246 Dissimilarity matrices (stRDMs) within a selected ROI between two conditions (e.g., *baseline*  
247 and *treatment* condition). We compute stRDMs on the BOLD percent signal change  
248 independently per subject and condition as follows: for each condition, we iteratively correlated  
249 (Pearson  $r$ ) the values of all the voxels at one time point with all the remaining ones amongst  
250 the epochs of two different trials (e.g. the time course elicited by trial 1 and that elicited by trial  
251 2) and calculated the correlation distance (i.e.  $1-r$ ; see Figure 1). This procedure was repeated  
252 across all possible trial pair combinations. The resulting matrices were fisher-z transformed to  
253 render the skewed Pearson- $r$  distribution approximately normal. We then averaged (10%  
254 trimmed mean) the single trial correlational distance matrices to obtain the single subject  
255 stRDM.

256

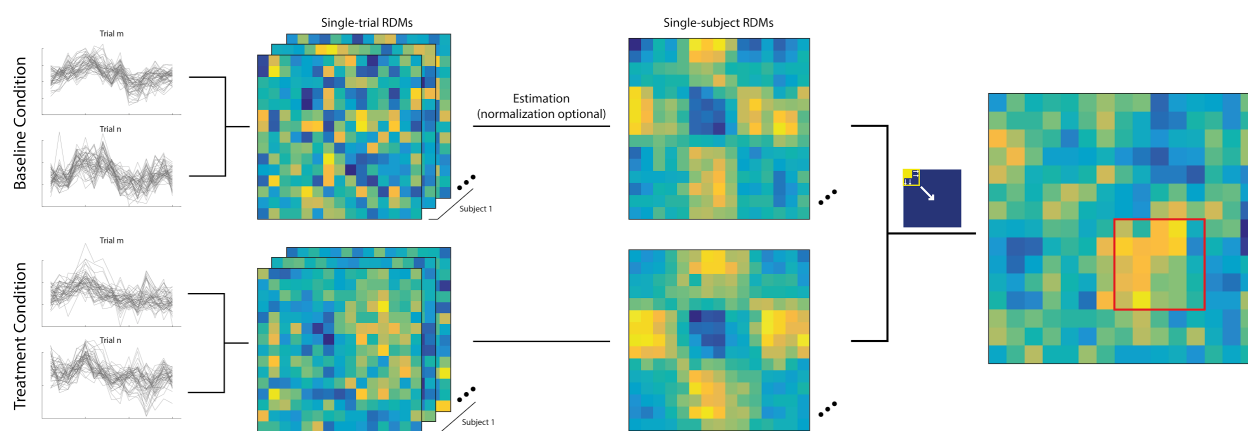

257

258 *Figure 1. The temporal multivariate pattern analysis (tMVPA) procedure. Cool colors indicate*  
259 *higher similarity between neural representations elicited by any 2 given time points. Warm*  
260 *colors indicate higher dissimilarity or distinctiveness amongst neural representations. Each row*  
261 *and column represents a single TR.*

262

263 While all subsequent statistical analyses were performed on the fisher-z transformed  
264 values, for visualization purposes (figure 1) and to render the values within the stRDMs  
265 interpretable, we performed the inverse of the fisher-z normalization on the final averaged  
266 stRDM.

267 To test for statistically significant differences between the stRDMs from different  
268 conditions (i.e., *baseline* and *treatment* condition), we implemented an expanding sliding  
269 window approach. We started by computing a simple subtraction between the stRDMs of the 2  
270 conditions of interest. We then centered a 2x2 pixel window (figure 2) on the first point of the  
271 diagonal of the matrix. We then computed the 10% trimmed mean across the values within the  
272 window. We divided this mean by the standard error of the values within the window. Given that  
273 the standard error is a function of the variance weighted by the number of data points, this  
274 procedure was implemented to partially account for the relative difference in terms of data  
275 points and variance across windows of different sizes. We then performed (1- $\alpha$ ) bootstrap  
276 confidence interval (CIs) analyses by sampling subjects with replacement 500 times.  
277 Importantly, we adjusted the threshold ( $\alpha$  above) for determining high and low CIs as a  
278 function of the total number of windows to account for multiple comparison problems (i.e.  
279 Bonferroni correction). The analysis was repeated on increasingly larger windows that  
280 expanded by 1 pixel in each direction (when applicable), centered on each point of the diagonal  
281 (figure 2). Differences between conditions were inferred when the btCIs did not include zero.  
282 This expanding sliding window approach allows investigating whether potential differences

283 across stRDMs encompass a few time points or whether these are sustained over a larger time  
284 window.

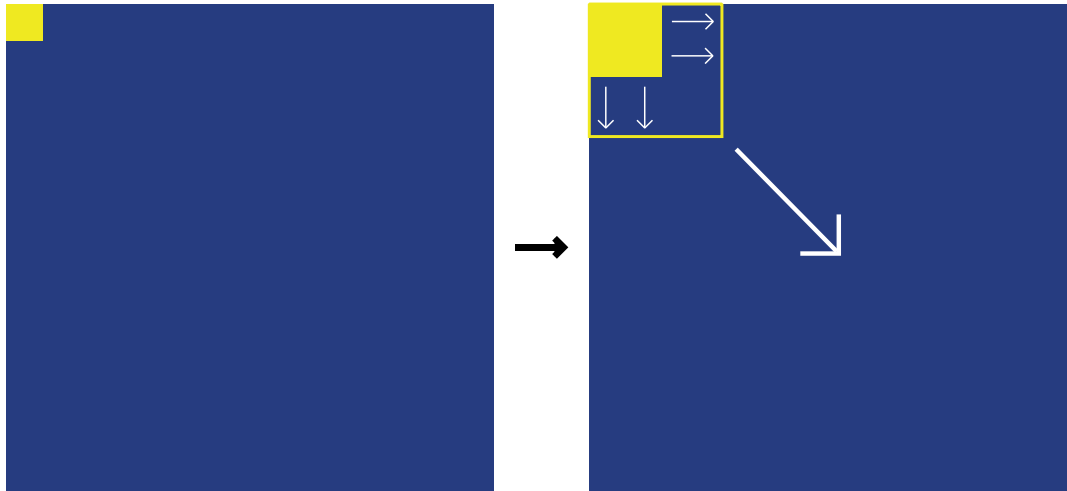

285  
286 *Figure 2: Expanding Sliding Window approach. The panel on the right depicts the starting*  
287 *window size and location, while the panel on the right represents this same window “expanding”*  
288 *(as indicated by the thin pairs of white arrows) and sliding (as indicated by the larger arrow).*

289

## 290 **Synthetic Data Generation and Validation**

291 The following sections describe the procedure we implemented for the synthetic data  
292 generation process and the approach we adopted to estimate the power and Family-wise error  
293 rate (FWER) of our proposed multivariate temporal analysis. In brief, we employed Monte Carlo  
294 (MC) simulation on synthetic data to estimate the FWER and the statistical power of our  
295 proposed method, explicitly manipulating a number of parameters (see the *Manipulated*  
296 *parameters paragraph*). In order to reproduce realistic fMRI noise and signal properties, we  
297 generated synthetic data starting from the BOLD signal recorded during the event-related  
298 experiment. We created a complete dataset comprised of 2 conditions (i.e. *Baseline* and  
299 *Treatment*). Importantly, we generated Baseline and Treatment conditions under 2 distinct

300 scenarios: 1) under  $H_0$  (i.e. no multivariate differences between conditions), thus being in the  
301 ideal context to measure our approach's FWER, as any statistical difference detected by our  
302 approach would be a false positive; and 2) under  $H_1$  (i.e. artificially introducing multivariate  
303 pattern differences between conditions - see *synthetic multivariate effect*) to test our approach's  
304 power (see below for more details).

305  
306 *Synthetic data generation.* Starting from the single trial BOLD time course matrix (see the *BOLD*  
307 *percent signal change and epochs definition* paragraph), we extracted single trial epochs from  
308 one of the 20 conditions for one participant across one run and using just a single ROI. We  
309 saved the extracted BOLD values in a 3D *Raw\_singletrials\_BOLD* matrix with dimensions  
310 [number of trials \* number of voxels \* number of time points]. From the *Raw\_singletrials\_BOLD*  
311 matrix we calculated the mean and the variance across voxels, and then saved these 2 metrics  
312 in 1D vectors of size [number of time points]. We refer to these vectors, representing  
313 respectively the average HRF for a given ROI and the voxel-wise variance within that same  
314 ROI, as  $\mu\_BOLD(\text{time point})$  and  $\text{var\_BOLD}(\text{time point})$ . We then calculated the residual  
315 between the single trials epochs and their mean (across trials) for each voxel and time point,  
316 and then saved these values in a [number of trials \* number of voxels \* number of time points],  
317 a 3D matrix that we refer to as  $\sigma\_BOLD(\text{trial}, \text{voxel}, \text{time point})$ .

318  
319 We repeated the procedure described above for all conditions, runs, ROIs, and subjects.  
320 The resulting  $\mu\_BOLD$ ,  $\text{var\_BOLD}$ , and  $\sigma\_BOLD$  were flattened and saved in 2  
321 dimensional matrices:  $\mathbf{E}$ ,  $\mathbf{V}$ , and  $\mathbf{S}$ . Note that the matrices  $\mathbf{E}$ ,  $\mathbf{V}$ , and  $\mathbf{S}$  have an equal numbers of  
322 columns, corresponding to the number of time points per epoch of interest (i.e. 15), but a  
323 different number of rows. For the matrices  $\mathbf{E}$  and  $\mathbf{V}$ , containing, respectively, the mean time  
324 courses across voxels and the variance across voxels, the number of rows was equal to  
325 [number of subjects \* number of runs \* number of conditions \* number of ROIs]; while the

326 number of rows for matrix **S**, containing the single-trial residual for each voxel, was equal to  
327 [number of subjects \* number of runs \* number of conditions \* number of ROIs \* number of trials  
328 \* number of voxels per ROI].

329  
330 The raw BOLD signal was thus fully represented in matrices **E**, **V**, and **S**. To generate synthetic  
331 data for one subject we randomly sampled one row vector from **E** and **V** and generated a 2D  
332 [number of voxel \* number of time points] matrix, representing the mean (across trials) time  
333 course for all voxels within a given ROI. We then injected the trials' variation from their mean by  
334 randomly sampling from **S** (**see below for details**).

335  
336 In order to generate the Baseline and Treatment conditions, we implemented very  
337 similar, albeit slightly different procedures. The first step of the data generation process (step 0)  
338 was the same regardless of the generation goal. For each MC simulation, we began by  
339 randomly selecting a row vector **e** from matrix **E**, representing the group average time course for  
340 a hypothetical ROI.

341  
342 For the Baseline condition, independently per subject we generated a number of voxels (*nv*)  
343 \* number of time points (*ntp*) \* number of trials (*ntrial*) matrix **MB**, following the 9 step algorithm  
344 below:

345  
346 • Step 1, we randomly selected a row vector **v** from matrix **V**, and *nv\*ntrial* rows vectors  
347 from matrix **S** to get **sv**.

348 To have full control of the simulation study, we kept the variance across time points  
349 within a single voxel and a single trial constant by setting  $v_{_1} = v_{_2} = \dots = v_{_ntp} =$   
350  $mean(\mathbf{v})$  and  $sv_{_1,i} = sv_{_2,i} = \dots = sv_{_ntp,i} = mean(\mathbf{sv})$  for  $i \sim [1, nv]$ .

351

352 • Step 2, we repeated  $nv$  copies of array  $\mathbf{e}$  and transformed them into a  $nv*ntp$  matrix  $\mathbf{ev}$ .

353

354 • Step 3, we repeated  $nv$  copies of array  $\mathbf{v}$  and transformed them into a  $nv*ntp$  matrix  $\mathbf{vv}$ .

355

356 • Step 4, we generated a  $nv*ntp$  matrix  $\mathbf{dv1}$  to represent the variance across voxel. Each  
357 element in  $\mathbf{dv1}$  was generated following one of 3 distributions: either  $Normal(\mu=0,$   
358  $sd=1)$ ,  $Uniform(lower=-\sqrt{3}, upper=\sqrt{3})$ , or  $Exponential(\lambda=1) - 1$ . These three  
359 distributions all have mean equal to 0 and variance equal to 1.

360

361 • Step 5, the mean BOLD time course for each voxel  $\mathbf{Mp}$  was generated following the  
362 equation:

$$363 \quad \mathbf{Mp} = \mathbf{ev} + \mathbf{dv1}.*\sqrt{\mathbf{vv}}$$

364

365 Where "."\* indicates the element-wise multiplication. By doing this,  $\mathbf{Mp}$  satisfies  
366  $mean(\mathbf{Mp}) = \mathbf{e}$  and  $var(\mathbf{Mp}) = \mathbf{v}$ .  $\mathbf{Mp}$  is an  $nv*ntp$  matrix representing the single voxel  
367 BOLD time course.

368

369 • Step 6, we repeated  $ntrial$  copies of matrix  $\mathbf{Mp}$  and transformed them into a  $nv*ntp*ntrial$   
370 matrix  $\mathbf{MP}$ .

371

372 • Step 7, we reshaped the residual matrix  $\mathbf{sv}$  into an  $nv*ntp*ntrial$  matrix and computed the  
373 variance across trials. The resulting  $nv*ntp$  matrix was then repeated and reshaped into  
374 an  $nv*ntp*ntrial$  matrix  $\mathbf{svt}$  representing the single trials residuals for each voxel and  
375 timepoint.

376



377 • Step 8, we generated an  $nv*ntp*ntrial$  matrix **dv2**. Similar to **dv1**, each element in **dv2**  
378 followed one of 3 distributions: either  $Normal(\mu=0, sd=1)$ ,  $Uniform(lower=-\sqrt{3},$   
379  $upper=\sqrt{3})$ , or  $Exponential(\lambda=1) - 1$ . **dv2** represents the noise at the single trial  
380 level for each voxel.

381  
382 • Step 9, finally, we computed the single trials BOLD time course matrix **MB** following the  
383 equation:

$$384 \quad \mathbf{MB} = \mathbf{MP} + \mathbf{dv2} \cdot \sqrt{\mathbf{svt}}$$

385  
386 Notice that the mean and variance across trials for **MB** satisfies  $mean(\mathbf{MB}) = \mathbf{Mp}$  and  
387  $var(\mathbf{MB}) = \mathbf{svt}$ .

388  
389 These 9 steps were repeated for all subjects.

390  
391 Similar to the baseline conditions, we generated an  $nv*ntp*ntrial$  **MT** Treatment condition matrix  
392 for each subject following the same 9 steps.

393  
394 When no effect was introduced in the Treatment condition (i.e. FWER estimation, see  
395 below), the **MT** matrix creation began directly at step 7 (through to 9), starting from the same  
396 **MP** and **sv** generated for the Baseline condition using steps 1 to 6. Thus, the **MT** mean and  
397 variance across trials satisfies  $mean(\mathbf{MT}) = \mathbf{Mp}$  and  $var(\mathbf{MT}) = \mathbf{svt}$ .

398  
399 *Synthetic multivariate effect.* Our procedure to introduce multivariate differences between the  
400 baseline and treatment conditions consisted of rendering the voxel response for some selected  
401 time points in the treatment condition highly correlated across trials. To achieve this, we first

402 repeated steps 1 to 9 to generate matrix  $\mathbf{M}_p'$ , containing the treatment condition mean BOLD  
403 time course across all trials for all voxels within a given ROI;  $\mathbf{M}_P'$ , containing the single trials  
404 BOLD time-course for all voxels within any given ROI;  $\mathbf{svt}'$ , containing the residuals between  
405 the single trials and average across trials for each voxel, time-point, and trial; and  $\mathbf{MT}'$ ,  
406 containing the single trials' BOLD time courses for all voxels within a given ROI. We therefore  
407 modulated  $k$  consecutive time points in matrix  $\mathbf{MT}'$  to introduce correlation in the synthetic signal  
408 by rotating the data matrix  $\mathbf{MT}$  to reduce the multivariate distance across trials<sup>1</sup>. Independently  
409 for each of the  $k$  time points, we first repeated step 8 to generate a new independent and  
410 identically distributed (i.i.d.) noise matrix  $\mathbf{dv2}'$ . We then computed the BOLD time course for the  
411 treatment condition  $\mathbf{MT}$  following the equation:

412

$$413 \quad \mathbf{MT}'[:, k, :] = \mathbf{M}_P'[:, k, :] + \text{diag}(\sqrt{\mathbf{svt}'[:, k, 1]}) * \mathbf{L} * \mathbf{dv2}'[:, k, :],$$

414

415 where  $\mathbf{L}$  is the Cholesky factor of a correlation matrix randomly sampled from a LKJ correlation  
416 distribution (Lewandowski et al., 2009). Therefore, the variance across voxels for  $k$ -th time  
417 points of some selected voxels was identical:

418

$$419 \quad \text{var}(\mathbf{M}_p'_{t:t+k}) = \text{var}(\mathbf{M}_p_{t:t+k}) = \mathbf{v}.$$

420

421 Notice that the univariate pattern in  $\mathbf{M}_p'$  was kept constant:  $\text{mean}(\mathbf{M}_p') = \mathbf{e}$ . Moreover, the mean  
422 and variance across trials for  $\mathbf{MT}'$  also satisfies  $\text{mean}(\mathbf{MT}') = \mathbf{M}_p'$  and  $\text{var}(\mathbf{MT}') = \mathbf{svt}'$ .

423

---

<sup>1</sup> Note that correlational distance  $1-r$  can be conceptualized as distance between 2 points in a multidimensional space. In the same vein, we can think of increase in correlation (and therefore decrease in correlational distance) between these 2 points as a rotation of axis of the the multidimensional space for point 1

424 The resulting data matrix **MB** and **MT'** represented the full synthetic dataset for one  
425 subject. We repeated the above 9 steps to generate  $k$  (number of subject) **MB** and **MT'**  
426 matrices. We therefore implemented our TMPVA analysis to test for multivariate differences  
427 between the treatment and baseline conditions. We repeated this MC simulation 1000 times for  
428 each combination of parameters (details below).  
429

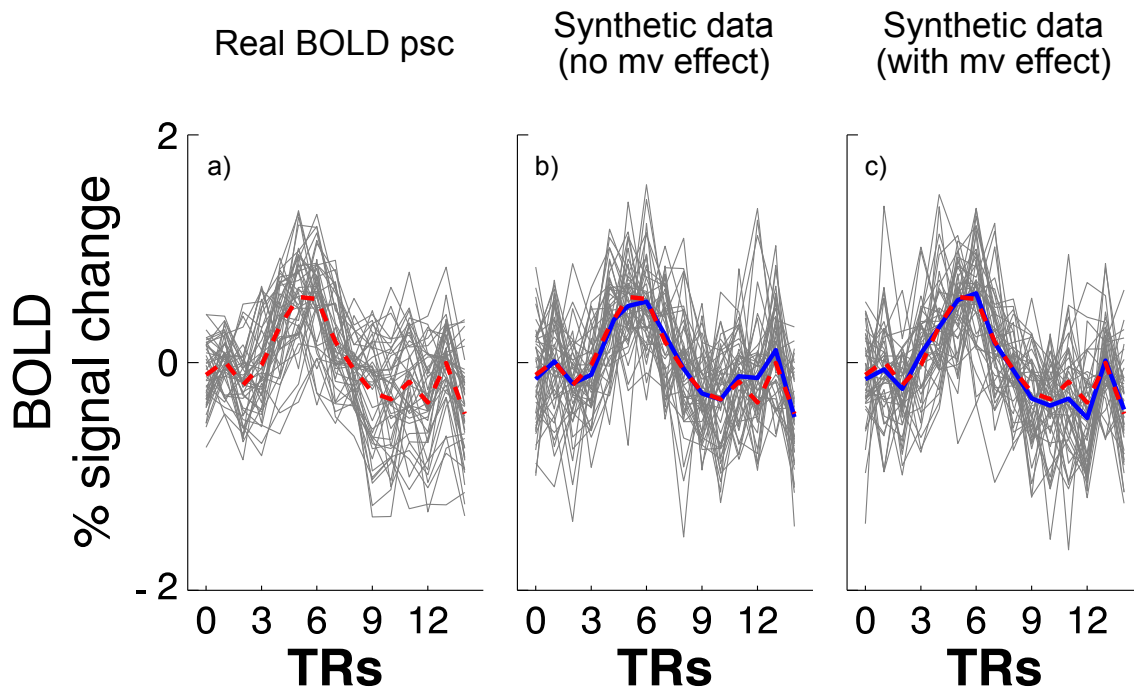

430  
431 *Figure 3: Panel a) portrays an example of real BOLD percentage signal change (psc) time*  
432 *course for all voxels in a given ROI for a single subject. The grey line plots show the BOLD time*  
433 *course for each voxel, while red dashed line shows the average BOLD time course. Panels b)*  
434 *and c) depict the generated synthetic BOLD time course created using the same mean and*  
435 *variance of the real BOLD time course. Panel b) shows an example of the synthetic baseline*  
436 *condition - i.e. no multivariate (mv) effect; and Panel c) shows an example of a synthetic*  
437 *treatment condition where we introduced a mv effect (see the Synthetic multivariate effect*  
438 *paragraph) over time points 5-7. Grey line plots show single voxels, the red dashed line shows*

439 *the average time course of the real signal, the blue line shows the average time course of the*  
440 *synthetic data.*

441  
442 *Manipulated parameters.* In an attempt to maximally parameterize our validation procedure  
443 while keeping within the boundaries of reasonable computational demands, we manipulated the  
444 following 4 parameters: 1) number of trials per condition, 2) number of subjects per group, 3)  
445 number of time points at which the effect was introduced, and 4) the percentage of subjects (or  
446 trials for the single subject validation procedure) in which the effect was introduced (i.e. the  
447 target power).

- 448 1. the number of trials varied across 4 different levels: 4, 8, 12, and 16.
- 449 2. for the number of subjects, we tested 4 sample sizes: 6, 10, 14, 18 participants.
- 450 3. while the multivariate effect always began at TR 5, the number of time points at which  
451 the effect was introduced varied across 4 different levels: 2, 3, 4, 5.
- 452 4. the percentage of sample showing effect (i.e. power), varied across three different  
453 levels: 50%, 65%, and 80%.

454  
455 Additionally, the number of voxels (range [30, 60]) per simulated subject was  
456 randomized across all MC simulations. We thus ran independent MC simulations for all possible  
457 combinations of the different parameter levels. This parameterization of the MC simulation was  
458 implemented to evaluate the reliability and sensitivity of our method in different experimental  
459 contexts. Note that we introduced a multivariate effect for our power analysis at time point 7 (up  
460 to time point 11, depending on the number of manipulated time points). For the estimation of  
461 FWER, only number of trials and number of subjects were relevant parameters. For each  
462 unique parameter combination, we computed 95% bootstrap CI based on 500 bootstraps, and  
463 repeated this procedure 1000 times.

464

465           Importantly, we validated our tMVPA approach within two different settings: *group*  
466 *analysis* and *single subject analysis*. In the group analysis setting, to manipulate the target  
467 power we varied the percentage of subjects in which we introduced correlation across voxels  
468 (i.e. the synthetic multivariate effect). In the single subject validation setting, the target power  
469 was instead manipulated by varying the percentage of trials in which the multivariate pattern  
470 was introduced (i.e. 50%, 65% or 80% of the trials).

471  
472 *FWER estimation*. To estimate the FWER, we performed tMVPA analysis to test for multivariate  
473 differences between the time courses of the baseline and treatment conditions, prior to  
474 introducing correlation across voxels at selected time points. We thus counted the number of  
475 significant events detected by our approach. We repeated this procedure 1000 times. Since  
476 baseline and treatment conditions were created under H0 (i.e. no differences between them),  
477 significant differences detected by our approach were considered to be false positives (i.e. type  
478 II error). The FWER was thus computed as the total number of significant time windows divided  
479 by 1000 (i.e. the total number of MC simulation).

480  
481 *Statistical power estimation*. For statistical power estimation we, instead, generated 1000  
482 *treatment* conditions following a procedure similar to the generation of the *baseline* condition  
483 (i.e. steps 1 to 9 as described earlier). We additionally introduced multivariate differences  
484 between conditions (see *Synthetic multivariate effect*) in a number of subjects by manipulating  
485 the pattern of voxels within a given ROI over some selected time points (see *Manipulated*  
486 *parameters for more details*). Importantly, no univariate differences (i.e. no differences between  
487 the time courses averaged across voxels - see figure 3 and 4) between the two conditions  
488 existed over these time points. The target power of the tMVPA approach was represented by  
489 the percentage of subjects for whom we introduced multivariate differences between conditions.  
490 For example, if we introduced correlation across voxels in 80% of the subjects, we expected the

491 tMVPA to report significant differences 80% of the time across all simulations where the effect  
492 was introduced. The statistical power of tMVPA was thus computed as the total number of  
493 significant time windows detected divided by the total number of MC simulations.

## 494 Results

495 95% bootstrap confidence intervals (btCIs) computed across our MC simulations  
496 showed that manipulating the number of time points at which we introduced the synthetic  
497 multivariate effect did not significantly ( $p > .05$ ) impact FWER and power estimations (see  
498 supplementary section). Additionally, we observed that the distribution from which we sampled  
499 the synthetic noise did not significantly ( $p > .05$ ) modulate FWER and power estimations (see  
500 supplementary section). We therefore only report the results for synthetic data with a  
501 multivariate effect over 3 time-points, generated by sampling noise from a normal distribution.  
502 Figures and results for the remaining levels of these 2 parameters as well as detailed tables  
503 reporting mean and bootstrap CIs can be found in the supplementary section.

504 In the following paragraph we report the mean across all MC simulations and standard  
505 deviation (std) of the peak amplitude of the BOLD % signal change time course. We further  
506 report the mean std across voxels, trials, and time course. In the MC simulations for the group  
507 study, the mean peak amplitude (across subjects and MCs) of the generated synthetic BOLD %  
508 signal change was 1.222 (std = .531), while a mean std across time 0.353 (std = .137).  
509 Moreover, the average std across voxels was 2.815 (std = 2.643) and the average std across  
510 trials 1.343 (std = .348). As for the MC simulation for the single subject study, the generated  
511 synthetic data set had a mean (across MCs) peak amplitude of 1.247 (std = .533), with a mean  
512 std across time 0.357 (std = .106). The mean std across voxels was 2.996 (std = 2.409), and the  
513 mean std across trials was 1.364 (std = .362).

514  
515 Figure 4: (panels a through e) shows the BOLD time course of our synthetic data for the  
516 18 subjects and 16 trials scenario. Error bars represent the 95% bootstrap confidence intervals  
517 (btCIs). We infer robust statistical significance ( $p < .05$ ) when the error bars do not overlap. Our  
518 analyses revealed no significant univariate amplitude differences across the whole time course

519 between the *baseline* (red line) and the *treatment* (blue line) conditions for all the parameter  
520 manipulations (see manipulated parameters). Importantly, this absence of univariate amplitude  
521 differences persisted even after we synthetically introduced multivariate effects at selected time-  
522 points. Our tMVPA approach, thus, crucially revealed robust *genuine* multivariate differences  
523 across conditions that are not evident in univariate amplitude differences. Note that the  
524 introduced multivariate effect is visible by computing the stRDM, as shown in Figure 4f for the  
525 *baseline* condition and Figure 4h-4j for the *effect* condition.  
526

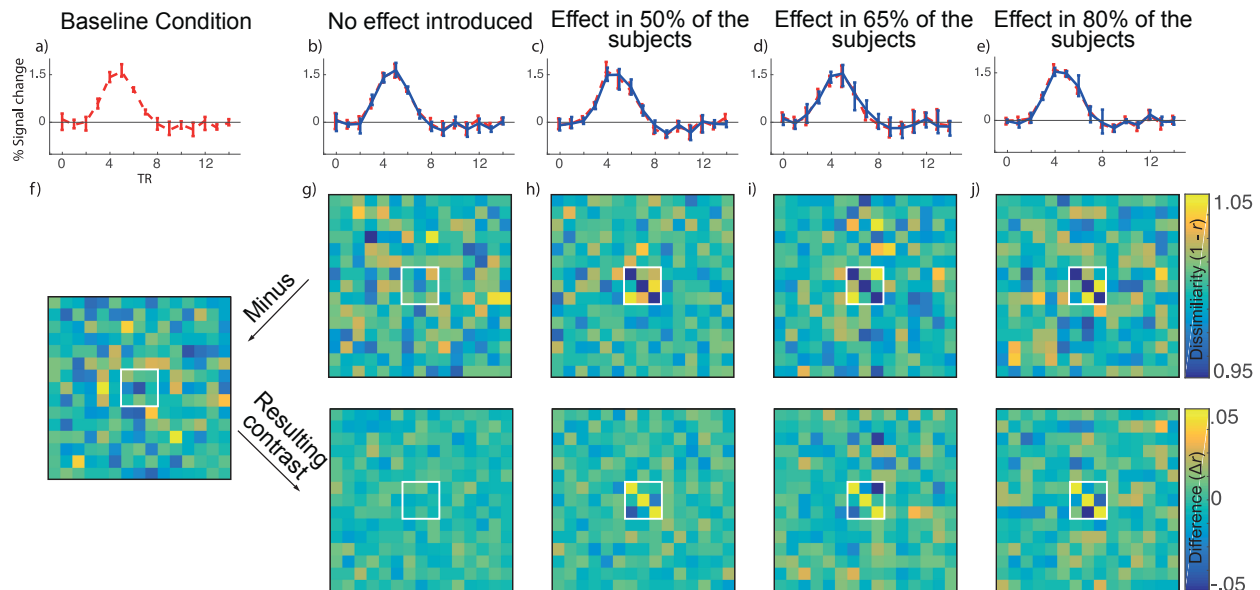

527  
528 **Figure 4: Synthetic data for the 18 subjects and 14 trials group a)-e)** Average time course  
529 across voxel participant within a ROI. Red line shows baseline condition (a) and blue line shows  
530 Treatment condition. Error-bars shows 95% bootstrapped confidence interval across subjects  
531 for each time point. f) stRDM of the baseline condition. g) stRDM of the treatment condition  
532 when no effect is introduced (to estimate FWER). h)-j) stRDM of the treatment condition when  
533 different strengths of the multivariate effect is introduced over time-points 5-7 .



## 534 **Family-wised error rate (FWER) under H0**

535 For both the group and single subject scenarios, to estimate the FWER we computed  
536 the frequency of significant outputs detected by our approach across MC settings, before  
537 introducing the multivariate effect. As explained earlier, prior to introducing correlation across  
538 voxels over a number of selected time points, we generated the synthetic baseline and  
539 treatment data under H0 (i.e. no differences between conditions). We were, therefore, in the  
540 ideal context to estimate FWER, as statistically significant differences between conditions were  
541 mere type I errors.

### 542 **Group-level analysis**

543 95% bootstrap confidence intervals (btCIs) show that FWERs were significantly below  
544 .05 in all MC simulation with sample size > 6 (Figure 5). For N=6 the mean of the estimated  
545 FWER was, instead, consistently above .05 (mean FWER: .058), regardless of the number of  
546 trials. The 95% btCIs (mean btCIs [.044 .073], however, indicated that even for N=6, FWER are  
547 not significantly larger than .05 (see figure 5). While according to Westfall and Young (1993) this  
548 still suggests the group analysis is valid, we would recommend caution using our tMVPA with  
549 only 6 subjects. This is because the FWER for N=6 were significantly larger than those  
550 estimated for all other sample size (6 subjects simulation lowest mean FWER and btCIs: .056;  
551 [.042 .07]; highest FWER and btCIs across the remaining MC simulations: .03; [.02 .042]. For a  
552 complete table of all FWER and btCIs see supplementary section). **Overall, our approach**  
553 **achieved the desired FWER at 5% under the group analysis setting.**

### 554 **Single-subject analysis**

555 Similarly, FWERs were not significant above .05 in all MC simulations, regardless of the  
556 number of trials, as shown in Figure 5 above. The highest FWER is 0.056 [0.043, 0.071] in the

557 simulation with 4 trials, and the lowest FWER is 0.006 [0.003, 0.013] in the simulation with 16  
558 trials (For a complete table of all FWER and btCIs see supplementary section). The 4 trials  
559 scenario produced significantly higher FWER than all other trials groups. While still not  
560 significantly larger than .05, we would still recommend caution if implementing our TVMPA  
561 approach with less than 8 trials, due to the risk of incurring Type I errors. Overall, **the**  
562 **simulation result clearly showed that in a single-subject analysis setting, our approach**  
563 **achieved the desired FWER at 5% even with as little as 8 trials.**

564

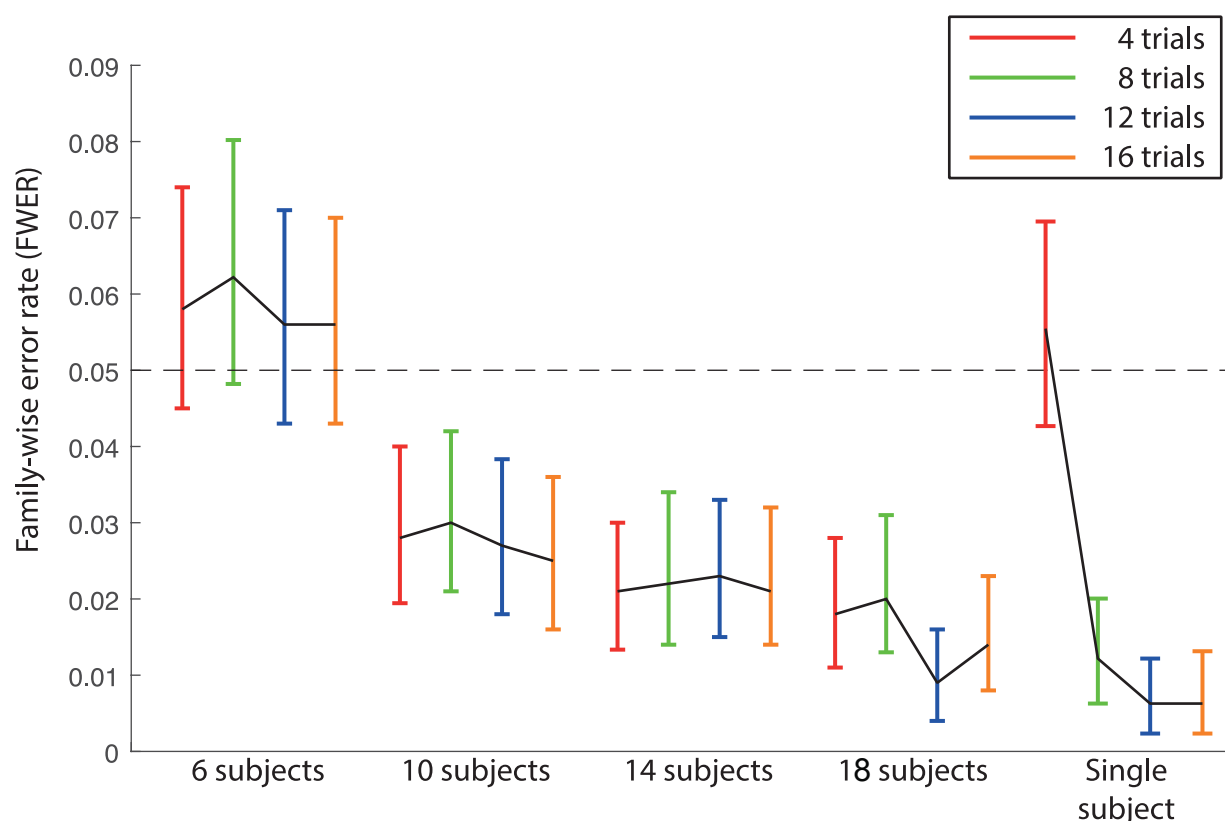

565 *Figure 5: FWER for all trials numbers, subjects groups and for the single subject scenario. Here*  
566 *we show the family-wise error rate for the Monte Carlo simulated synthetic data with noise*  
567 *sampling from a Normal distribution. Error-bars represent the 95% bootstrap confidence interval*  
568 *of the Monte-Carlo simulation.*

570

## 571 **Power analysis**

### 572 **Group-level analysis**

573           btCIs analysis generally revealed that for the group scenario, regardless of the number  
574 of trials, tMVPA was relatively underpowered when differences across conditions were present  
575 in 50% and (to a lesser extent) 65% of the subjects. As shown in Figure 6, the power of our  
576 approach increases as the number of subjects and the number of trials increases. With the  
577 effect introduced in 50% of the subjects, we estimated a power of 0.15 [0.132, 0.176] at the  
578 lowest number of subjects and trials (6 subjects with 4 trials each), to 0.27 [0.247, 0.297] at the  
579 highest tested number of subjects and trials (18 subjects with 16 trials each). Importantly, when  
580 we introduced the effect in 80 % of the subjects, the 16 trials simulations led to significantly  
581 ( $p < .05$ ) higher power than the 8 and 4 trials scenarios for all sample sizes. Moreover, while  
582 generally displaying higher mean power, the 16 trials simulation never significantly ( $p > .05$ )  
583 differed from the 12 trials one. It is also worth noting that when  $N = 18$ , both the 16 and 12 trials  
584 simulations led to significantly higher power ( $p < .05$ ) compared to the 4 and 8 trials simulations,  
585 regardless of the number of subjects in which we introduced an effect. Furthermore, for the 14  
586 subjects simulations only, the power estimated for the 4 trials scenario was significantly lower  
587 than all other group sizes, regardless of the number of subjects displaying the effect.

588 Not surprisingly, the highest statistical power was reached in the 18 subjects simulations with a  
589 minimum of 12 trials. Within this context, the tMVPA approaches 0.8 when we introduced the  
590 multivariate effect in 80% of the subjects (0.76 [0.731, 0.784], see also Figure 6). A detailed  
591 report of mean power and btCIs for all MC simulations can be found in the supplementary  
592 section.

593

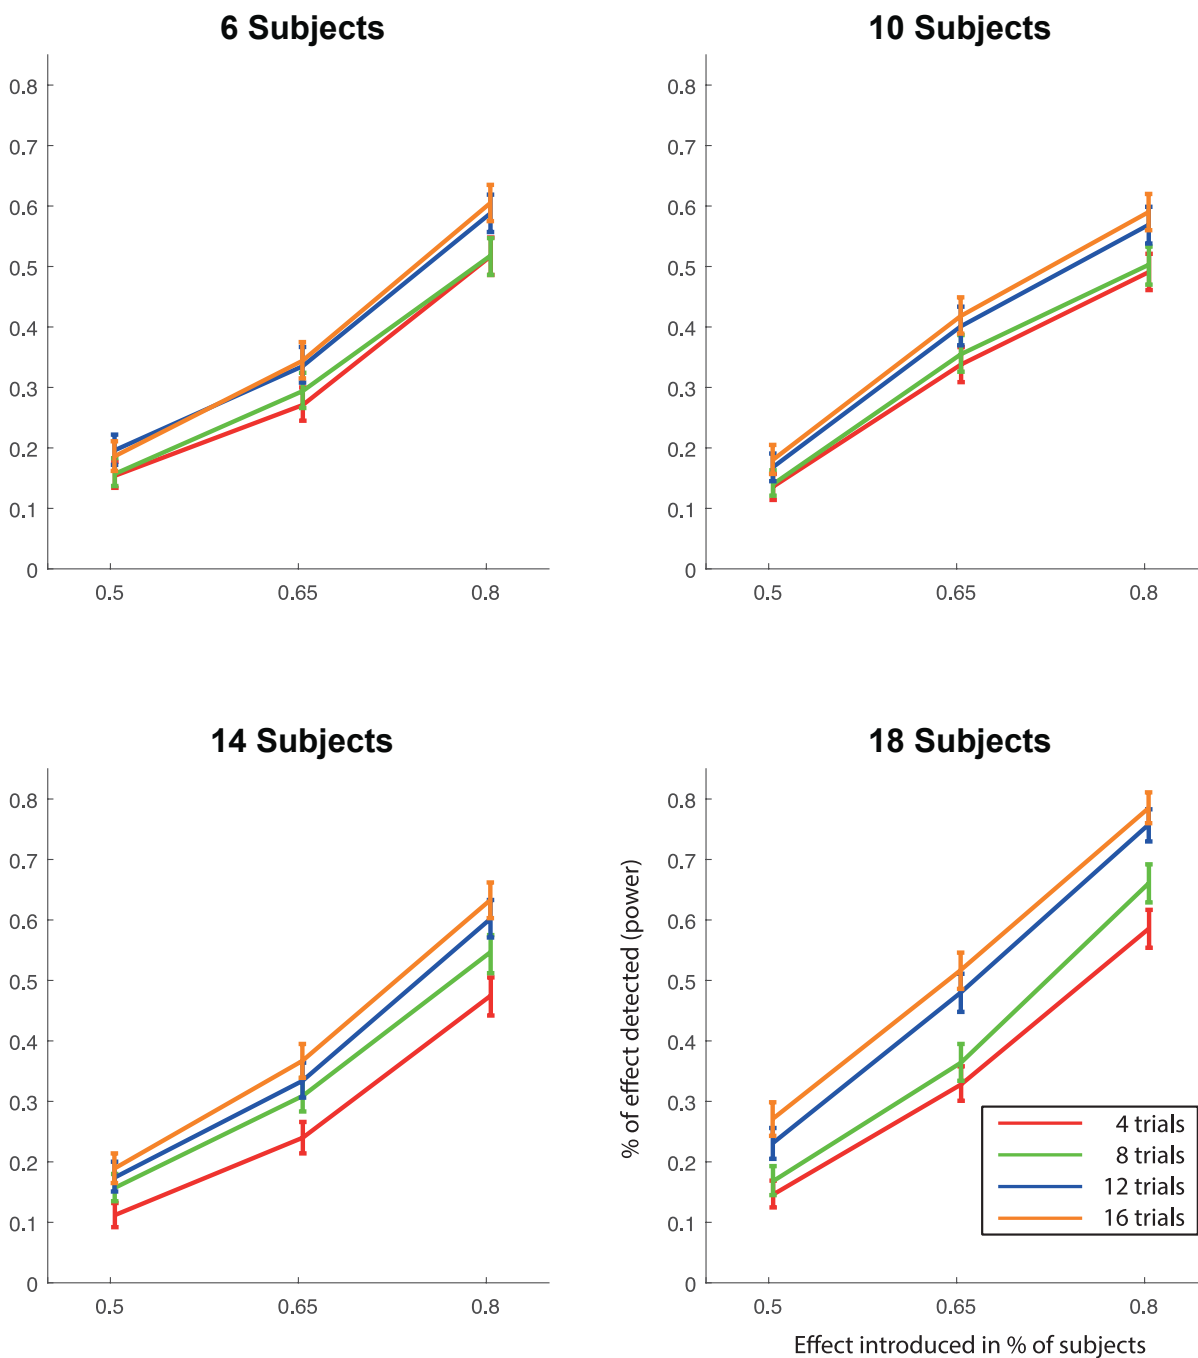

594  
595 *Figure 6: Statistical power of the group-level analysis. Error-bars represent the 95%*  
596 *bootstrapped confidence intervals across Monte-Carlo simulations.*

## 597 Single-subject analysis

598 As shown in Figure 7, the power of our approach increases as the number of trials  
599 increase. With the effect introduced in 50% of the trials, we estimated the power of our  
600 proposed approach at 0.10 [0.087, 0.126] with 4 trials, and at 0.28 [0.260, 0.317] with 16 trials.  
601 With the total number of 16 trials, the statistical power of the proposed approach reached 0.8  
602 when the effect was introduced in 80% of the trials (0.80 [0.776, 0.827]). Importantly, regardless  
603 of the percentage of trials in which we introduced the effect, the 16 trials simulations led to  
604 significantly ( $p < .05$ ) higher power compared to all other simulations. Moreover, while  
605 significantly ( $p < .05$ ) lower than its 16 trials counterpart, the 12 trials simulations also led to  
606 significantly ( $p < .05$ ) higher power than the 2 remaining trials scenarios (see figure 7), peaking  
607 when 80% of the trials showed a multivariate effect (mean power: 0.719; btCIs: [0.691, 0.747]).  
608 A detailed report of mean power and btCIs for all MC simulations can be found in the  
609 supplementary section.

610

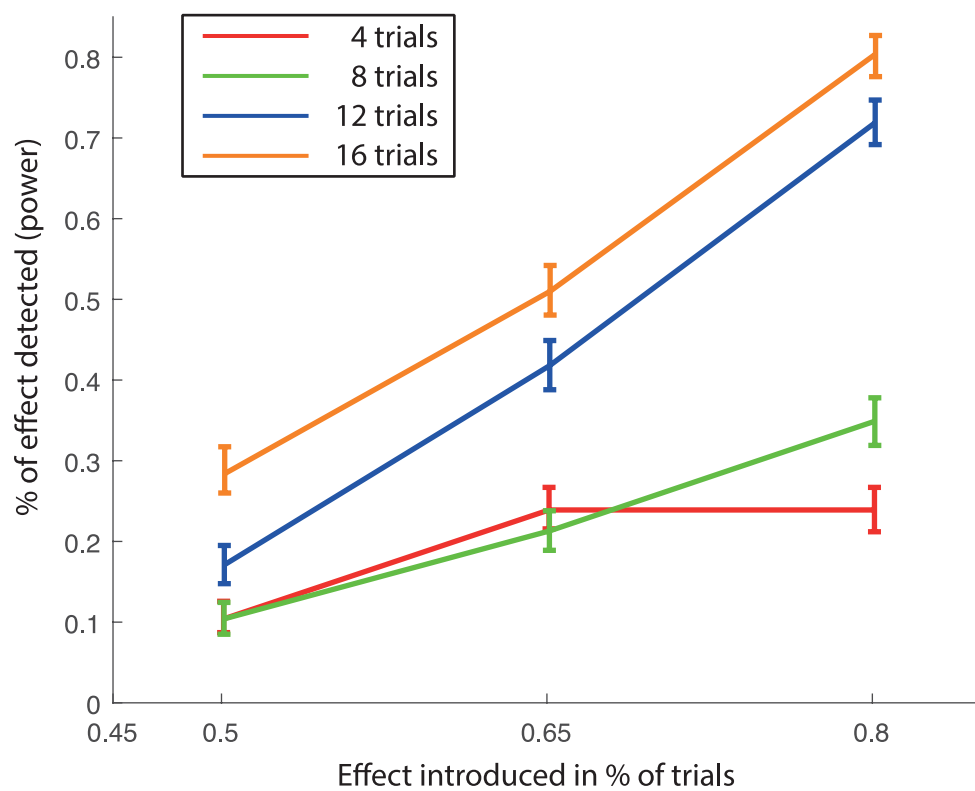

611  
612 *Figure 7: Statistical power of the single-subject analysis. Error bars represent the 95%*  
613 *bootstrapped confidence intervals across Monte-Carlo simulations*

## 614 Discussion

615 In this paper, we present temporal Multivariate Pattern analysis (tMVPA), a method that  
616 we developed to quantify the temporal evolution of single trial dissimilarity across multivoxel  
617 patterns evoked by a given stimulus within a defined ROI. tMVPA builds upon the generation of  
618 single trial Representation Dissimilarity Matrices (stRDM) independently per ROI and condition:  
619 for all trials pairs, we iteratively cross-correlate the multivoxel pattern of BOLD % change across  
620 all possible time points combinations and we calculate its correlation distance (1-r). We then  
621 implemented a robust expanding sliding window approach to identify the temporal loci where  
622 statistically significant differences between conditions can be inferred (see methods). We  
623 validated this method for group and single subject analyses on data that were synthetically  
624 generated using noise (e.g. std across voxels, trials and time points) and signal (e.g. the BOLD  
625 time course) parameters derived from real fMRI data. Our validation analysis revealed 2 main  
626 findings: 1) our tMVPA approach reached the desired FWER ( $\leq .05$ ) for both the group and  
627 single subject approach; and 2) Our power analysis showed that: a) for the *group* scenario, the  
628 tMVPA approach reached the desired power with a sample size of 18 subjects, each with 12  
629 trials or more, when 80% of the participants displayed the desired multivariate effect. In all other  
630 contexts (i.e.  $< 18$  subjects,  $< 12$  trials and  $< 80\%$  of subjects showing the effect), our method  
631 tends to be relatively underpowered and b) similarly, for the *single subject* scenario, our  
632 approach reached the desired power with at least 12 trials, when the multivariate effect of  
633 interest was present in 80% of them. All other simulation scenarios failed to reach the target  
634 power. These findings are discussed in detail below.

635  
636 *Group analysis.* Simulation results indicate that when the sample size is less than 8 subjects,  
637 regardless of the number of trials per condition or percentage of effect introduced, our technique  
638 is significantly ( $p < .05$ ) below the lower margin of the desired FWER (.05) (Figure 7). Thus, a

639 minimum of 8 subjects is needed to maintain Type I error rate. Moreover, it is worth noting that  
640 for  $N=6$ , FWER is not significantly larger than .05, a finding which advocates the validity of the  
641 group analysis (Westfall, P. H., & Young, 1993; Westfall et al., 1993) (at least in terms of false  
642 positive rate). Nonetheless, we observe that when  $N=6$ , the estimated FWERs are significantly  
643 larger than all other samples and MC simulations (see figure 5), which may significantly inflate  
644 the occurrence of Type I errors for this specific sample size.

645 Furthermore, the results of our power analysis suggest that a minimum of 18 subjects  
646 with at least 12 trials per condition is required to achieve adequate statistical power. While a  
647 sample size of 18 subjects could be regarded as sufficient for the majority of current fMRI  
648 studies, low  $N$  is considered one of the main culprits for the so called “replication crisis” (Button  
649 et al., 2013; Maxwell et al., 2015; Schooler, 2014). Consequently, the field of science as a  
650 whole, and specifically disciplines such as psychology and cognitive neuroscience, is  
651 undergoing a targeted endeavor aimed at augmenting the experimental sample size, in an effort  
652 to increase statistical power and produce replicable results (Button et al., 2013; Maxwell et al.,  
653 2015; Schooler, 2014). Within this context, a sample size of 18 participants does not therefore  
654 seem prohibitive. Taken together, power analysis and FWER estimation indicate that a  
655 minimum of 18 subjects and 12 trials are required to implement tMVPA at the group level.

656  
657 *Single subject analysis.* One of the main advantages of the tMVPA analysis is the exploitation of  
658 single trials in computing temporal RDMs. Generating RDMs by correlating all possible single  
659 trial pairs leads to a distribution of single trial RDMs (stRDMs), which allows one to carry out  
660 second order inferential statistics at the single subject level. This procedure permits full  
661 exploitation of the trial-by-trial variability, which is lost in the group-level approach due to  
662 averaging. It is worth noting that, while still not significantly larger than the desired FWER of .05,  
663 the single subject validation procedure indicates that the 4 trial scenario produces significantly  
664 more FWER than all other trials groups. Not surprisingly, the peak statistical power is achieved



665 for the 16 trials simulations (figure 7). The 12 trials simulations, however, led to significantly  
666 higher statistical power than its 4 and 8 trials counterparts. Crucially, when the multivariate  
667 effect of interest is present in at least 80% of the trials, our approach achieves the desired  
668 power with 12 trials or more. With a minimum of 12 trials across runs, our approach reaches the  
669 desired power and FWER. This finding makes our tMVPA appealing and powerful, not only to  
670 carry out single subject statistics, but to investigate issues that have thus far been elusive to the  
671 world of cognitive neuroscience, such as individual differences in the BOLD response.  
672 Moreover, the ability to conduct single subject statistics is additionally advantageous for both  
673 piloting experimental designs and for analyzing experiments which are limited by low subject  
674 numbers due to, amongst other things, the time required in preprocessing and by-hand analysis  
675 (e.g., 7T laminar/columnar studies). Importantly, we show that we can carry out single subject  
676 analysis with a relatively parsimonious experimental design, which does not require a large  
677 number of trials.

678  
679 *General considerations on FWER and power analysis.* Though tMVPA was underpowered in  
680 simulations where 65% or fewer data points contained the effect of interest for both the group  
681 and single subject analyses, we argue that this is a potential strength rather than a weakness of  
682 our approach. While more likely to incur Type II errors (i.e. failing to reject  $H_0$ ), we would  
683 question the sensitivity, validity, and especially the generalizability of a method reporting  
684 statistical significance when only 65% or fewer data points display the effect being claimed. This  
685 argument becomes even more relevant in light of the recent emphasis of the scientific  
686 community on producing highly replicable studies, following the so called “replication crisis”  
687 (Schooler, 2014). We advocate the use of relatively more conservative statistical approaches,  
688 as we believe that overpowered statistical approaches can be regarded as one of the causes of  
689 the aforementioned replication crisis (Anderson & Maxwell, 2017). Furthermore, it is worth  
690 noting that the values estimated here (and the considerations that follow) are specific to our

691 experimental settings and image acquisition parameters. We chose a stimulation paradigm (i.e.  
692 850 ms visual stimulation; 4 trials per run) that is likely to lead to low evoked BOLD amplitude  
693 and, consequently, low experimental SNR (i.e. BOLD amplitude over trials measurement error).  
694 Under different stimulation regimes, such as longer stimulus presentation or block design  
695 experiments, we would expect higher statistical power or lower N to achieve the desired power.  
696 Moreover, at higher fields (i.e. 7T or above) the increase in both temporal and image SNR  
697 (Ugurbil, 2014) will be paired with a boost in statistical power. As such, the statistical power  
698 computed here in a relatively low SNR regime, represents a conservative estimate for the  
699 proposed approach.

700  
701 *Temporal multivariate approach to fMRI.* Traditionally, due to the sluggish nature of the  
702 hemodynamic based BOLD signal (Boynton et al., 1996; S Ogawa et al., 1993), fMRI's temporal  
703 resolution has traditionally been overlooked, deemed to be too inaccurate to measure the  
704 temporal dynamics of neural processing. More recently, however, a number of animal studies  
705 have begun exploring the temporal dimension of the BOLD signal. Functional images have been  
706 recorded in marmosets with a temporal resolution of 200 ms (Yen et al., 2018) and in rats with  
707 40 ms (Silva & Koretsky, 2002). Furthermore, human recordings have suggested that increasing  
708 fMRI temporal resolution may reveal insights into the temporal dynamics of neural processing.  
709 For example, recent evidence put forward by Lewis et al (Lewis et al., 2016) suggest that fMRI  
710 can measure neural oscillatory activity at a much higher rate than previously suggested,  
711 specifically up to 1Hz. Accordingly, Siero et al. (Siero, J.C., Petridou, N., Hoogduin, H., Luijten,  
712 P.R., Ramsey, 2011) showed that, away from large draining, vessels the hemodynamic  
713 response function peaks ~2 seconds earlier and is approximately 1 second narrower than  
714 previously reported, thus indicating that the neurovascular coupling occurs at a much shorter  
715 time-scale. Additionally, Vu et al.'s (Vu, A.T., Phillips, J.S., Kay, K., Phillips, M.E., Johnson,  
716 M.R., Shinkareva, S.V., Tubridy, S., Millin, R., Grossman, M., Gureckis, T., Bhattacharyya, R.,

717 Yacoub, 2016) work also advocates the importance of the BOLD temporal dimension. These  
718 authors showed that that, using MVPA, it is possible to extract timing information at fast TRs  
719 (i.e. 500 ms) that would otherwise be inaccessible (Vu, A.T., Phillips, J.S., Kay, K., Phillips,  
720 M.E., Johnson, M.R., Shinkareva, S.V., Tubridy, S., Millin, R., Grossman, M., Gureckis, T.,  
721 Bhattacharyya, R., Yacoub, 2016).

722         These observations highlight the growing interest in the temporal dynamics of the BOLD  
723 signal, motivating the need for novel analytical tools specifically tailored to extract BOLD  
724 temporal information. Within this context, the method we developed is highly advantageous in  
725 that it incorporates the multivariate dimension in the temporal analysis of the BOLD signal,  
726 rendering potentially unexplored temporal features accessible. This multivariate dimension  
727 comes from considering the spatial pattern of BOLD activity across the voxels population within  
728 a given ROI at every time-point. As such, tMVPA extends the power of fMRI, which has  
729 historically been in the spatial domain, to the much less studied temporal dimension.

730         tMVPA thus allows investigating the temporal evolution of neural representation, which is  
731 incredibly valuable for exploring a wide range of phenomena, from visual illusions (Ernst & Bu,  
732 2004; Schrater et al., 2004), real world scenes, and a variety of auditory paradigms (Baumann  
733 et al., 2010; Lee et al., 2012). As such, our method can be broadly applied to a large domain of  
734 stimulus paradigms.

735         Another interesting feature of tMVPA is the fact that paradigms utilizing active behavioral  
736 judgments of stimuli (as in Ramon et al. (Ramon et al., 2015)) may choose to align the analysis  
737 with either the stimulus onset or the behavioral response. This allows investigating response- as  
738 well as stimulus-locked modulations of neural representations over time.

739

740         It is also worth considering the nature of the effect being observed with tMVPA. Our  
741 technique measures multivariate activity at the population level accessible with fMRI [~640,000  
742 neurons (Lent et al., 2012)], and is as such constrained by the temporal lag of the BOLD signal

743 (S Ogawa et al., 1993). While these constraints limit its temporal precision, especially relatively  
744 to the resolution available using invasive electrophysiological techniques (Meyers et al., 2015),  
745 tMVPA does provide valuable insights into the *relative* temporal dynamics of the neural  
746 processes captured with fMRI. In essence, while tMVPA won't provide direct insights into the  
747 actual temporal window of neural processing, the careful investigation of temporal aspects of  
748 the BOLD signal could provide important information regarding the neural substrates of  
749 cognition (Seiji Ogawa et al., 2000; Smith et al., 2012). For example, the relative BOLD latency  
750 differences between experimental conditions can be related to diverse cognitive processes  
751 (Gentile et al., 2017; Henson et al., 2002).

752 tMVPA analysis already proved useful by revealing crucial differences in the temporal  
753 processing of familiar and unfamiliar faces in the left fusiform face area and in the bilateral  
754 amygdala (Ramon et al., 2015). Importantly, in Ramon et al. (Ramon et al., 2015) these  
755 differences would have remained undetected using traditional temporal univariate analysis  
756 techniques, as we did not observe significant differences between the average (across voxels  
757 and trials) BOLD time courses of familiar and unfamiliar faces. Accordingly, our simulations  
758 were carried out on synthetic data that were carefully generated with the absence of univariate  
759 amplitude differences across conditions (figure 3). We thus replicated what we originally showed  
760 in Ramon et al. (Ramon et al., 2015), namely, the ability of the tMVPA approach to detect  
761 genuine temporal multivariate effects or ones not driven by mere univariate amplitude  
762 differences.

763         It must be noted that the differences between this work and Ramon et al. (Ramon et al.,  
764 2015) are substantial both in terms of stimulation paradigm and MR acquisition parameters.  
765 Their functional scans were acquired using a repeated, single-shot echo planar imaging  
766 sequence with 3.5-mm isotropic voxel, a 64 × 64 matrix, a TE of 50 ms, TR of 1250 ms, FA of  
767 90° and FOV of 224 mm. Moreover, Ramon et al. (Ramon et al., 2015) used a novel visual  
768 paradigm where a face stimulus was kept on screen for a duration of approximately 19 to 21

769 TRs, followed by a fixation period lasting 6 to 8 TRs. Yet, in spite of these differences, in both  
770 datasets our technique uncovered effects that were not detected when using traditional  
771 univariate methods focusing on amplitude differences between average time courses.

772  
773 *Validation on synthetic versus real data.* It is important to consider that the multivariate data  
774 used to assess this technique were generated synthetically (see methods). Our technique was  
775 initially conceived for use with experimentally derived data (Ramon et al., 2015). As the goal of  
776 the present study is to assess the experimental parameters and conditions under which our  
777 technique is most useful, the ability to manipulate these variables is crucial and thus synthetic  
778 data is ultimately necessary. As previously mentioned, in an effort to generate a synthetic data  
779 set with realistic signal and noise properties, we used noise and signal estimates from real fMRI  
780 data. We approximated the fMRI signal by averaging BOLD time courses across voxels, trials,  
781 and conditions, and the amount of noise by measuring the variability (i.e. standard deviation)  
782 across voxels, trials and time-points. Hybrid approaches to synthetic data generations, such as  
783 the one implemented here, are highly beneficial (Welvaert & Rosseel, 2013). They provide full  
784 control over the data set, while preserving realistic signal to noise estimates and, according to  
785 (Welvaert & Rosseel, 2013), may represent the ideal data generation procedure for statistical  
786 validation. Our data generation approach, however, builds upon random sampling of variance  
787 and signal properties across voxels, ROIs, conditions, and subjects (see methods). This  
788 procedure effectively impairs the original temporal and spatial autocorrelation present in fMRI  
789 data. In the present study, we did not attempt to reinject temporal and spatial autocorrelation in  
790 the synthetic data. The reason behind this choice is twofold. Firstly, fMRI has multiple sources  
791 of noise (e.g. thermal, physiological, motion, task), each of which is characterized by different  
792 distributions and parameters, making it difficult to accurately and comprehensively model all  
793 noise sources. As such, an exhaustive model that allows generation of realistic fMRI noise has  
794 yet to be formulated. In order to introduce synthetic but *realistic* spatio-temporal auto-correlated

795 noise in simulated fMRI data, there is first a need to formulate a comprehensive and realistic  
796 noise model. However, the quest for an exhaustive model for fMRI data (including noise)  
797 generation is challenging enough to require a study in and of itself tailored to tackle this specific  
798 endeavor (Davis et al., 2014) and, as such, is well beyond the scope of this article. Additionally,  
799 given the lack of a “ground-truth” noise model, noise estimates may be inaccurate or  
800 misrepresent the contribution of difference noise sources and, as such, noise injection may  
801 have a negative impact on the validation procedure as a whole. Secondly, we argue that the  
802 impact of spatio-temporal auto-correlated noise is minimal within these specific settings. The  
803 structure of the stRDMs when considering real, as opposed to synthetic, data can be seen in  
804 figure 1. Patches of similarity (cool colors) and dissimilarity (warm colors) exist in clusters of  
805 approximately 3-4 TRs. Such structure is due to the inherent spatiotemporal autocorrelation  
806 present in the BOLD signal, which is not dependent on experimental manipulations. Rather, it is  
807 a direct outcome of the HRF response properties. Specifically, BOLD activation for all voxels will  
808 synchronously rise for approximately the first 6 seconds after stimulus onset (varying depending  
809 on stimulus presentation time), and then decrease for the following 6 seconds, thus generating  
810 the structure visible in the matrices in figure 1. This structure will therefore be shared across  
811 conditions and subtracted out when performing the linear contrast between the stRDMs across  
812 conditions (see methods). As such, the inherent presence of autocorrelation in fMRI data, which  
813 is shared across conditions, becomes irrelevant in evaluating the validity of our validation  
814 procedure.  
815

## 816 **Conclusion**

817           In summary, we have developed a method for examining the representational content of  
818 fMRI data as a function of time, whereby enabling the investigation of the temporal evolution of  
819 neural representation. The method, that builds upon fMRI most recognized strength – namely its  
820 spatial resolution – to analyze BOLD temporal dynamics, consists of creating Single Trial  
821 Representational Dissimilarity Matrices (stRDMs) to measure the dissimilarity between the  
822 neural representations elicited by each acquired time point of a BOLD time course. We also  
823 introduced an expanding, sliding window method for inferring statistical significance. We  
824 validated our temporal multivariate pattern analysis (tMVPA) in both group and single subject  
825 settings using synthetically generated data. Our results show that we achieve adequate power  
826 FWER in both contexts. Along with the addition of a multivariate dimension to BOLD temporal  
827 analyses, tMVPA permits performing single subject’s inferential statistics by considering single  
828 trial distributions. Importantly, single subject analysis can be reliably implemented with a  
829 parsimonious experimental design that requires as little as 12 trials per condition across all runs.  
830 Furthermore, we show that, both in simulated as well as real settings (see Ramon et al. (Ramon  
831 et al., 2015)), our tMVPA is capable of detecting multivariate effects between experimental  
832 conditions in the absence of univariate amplitude differences. The technique presented here  
833 expands on traditional multivariate fMRI analyses, facilitating investigations of the evolution of  
834 neural representations over time.

835

## 836 **References**

- 837 Anderson, S. F., & Maxwell, S. E. (2017). Addressing the “ Replication Crisis ”: Using Original  
838 Studies to Design Replication Studies with Appropriate Statistical Power Addressing the “  
839 Replication Crisis ”: Using Original Studies to Design Replication Studies with Appropriate  
840 Statistical Power. *Multivariate Behavioral Research*, 52(3), 305–324.  
841 <https://doi.org/10.1080/00273171.2017.1289361>
- 842 Avossa, G., Shulman, G. L., Corbetta, M., Shulman, G. L., & Iden-, M. C. (2003). Identification  
843 of Cerebral Networks by Classification of the Shape of BOLD Responses, 360–371.
- 844 Bailey, C. J., Sanganahalli, B. G., Herman, P., Blumenfeld, H., & Gjedde, A. (2013). Analysis of  
845 Time and Space Invariance of BOLD Responses in the Rat Visual System, (January).  
846 <https://doi.org/10.1093/cercor/bhs008>
- 847 Ball, K., & Sekuler, R. (1982). A Specific and Enduring Improvement in Visual Motion  
848 Discrimination. *Science*, 218(4573), 697–698.
- 849 Baumann, S., Grif, T. D., Rees, A., Hunter, D., Sun, L., & Thiele, A. (2010). NeuroImage  
850 Characterisation of the BOLD response time course at different levels of the auditory  
851 pathway in non-human primates, 50, 1099–1108.  
852 <https://doi.org/10.1016/j.neuroimage.2009.12.103>
- 853 Beeck, H. P. Op De. (2010). NeuroImage Against hyperacuity in brain reading : Spatial  
854 smoothing does not hurt multivariate fMRI analyses ? *NeuroImage*, 49(3), 1943–1948.  
855 <https://doi.org/10.1016/j.neuroimage.2009.02.047>
- 856 Boynton, G. M., Engel, S. A., Glover, G. H., & Heeger, D. J. (1996). Linear Systems Analysis of  
857 Functional Magnetic Resonance Imaging in Human V1. *Journal of Neuroscience*, 16(13),  
858 4207–4221.
- 859 Button, K. S., Ioannidis, J. P. A., Mokrysz, C., Nosek, B. A., Flint, J., Robinson, E. S. J., &  
860 Munafò, M. R. (2013). Power failure: why small sample size undermines the reliability of



- 861 neuroscience. *Nature Reviews. Neuroscience*, 14(May), 365–376.
- 862 <https://doi.org/10.1038/nrn3475>
- 863 Carlson, T. A., Schrater, P., & He, S. (1999). Patterns of Activity in the Categorical
- 864 Representations of Objects, 704–717.
- 865 Cox, D. D., & Savoy, R. L. (2003). Functional magnetic resonance imaging ( fMRI ) “ brain
- 866 reading ”: detecting and classifying distributed patterns of fMRI activity in human visual
- 867 cortex, 19, 261–270. [https://doi.org/10.1016/S1053-8119\(03\)00049-1](https://doi.org/10.1016/S1053-8119(03)00049-1)
- 868 Davis, T., Larocque, K. F., Mumford, J. A., Norman, K. A., Wagner, A. D., & Poldrack, R. A.
- 869 (2014). What do differences between multi-voxel and univariate analysis mean? How
- 870 subject-, voxel-, and trial-level variance impact fMRI analysis. *NeuroImage*, 97, 271–283.
- 871 <https://doi.org/10.1016/j.neuroimage.2014.04.037>
- 872 Edwards, G., Vetter, P., Mcgruer, F., Petro, L. S., & Muckli, L. (2017). Predictive feedback to V1
- 873 dynamically updates with sensory input. *Scientific Reports*, 1–12.
- 874 <https://doi.org/10.1038/s41598-017-16093-y>
- 875 Ernst, M. O., & Bu, H. H. (2004). Merging the senses into a robust percept. *Trends in Cognitive*
- 876 *Sciences*, 8(4), 162–169. <https://doi.org/10.1016/j.tics.2004.02.002>
- 877 Feinberg, D. A., Moeller, S., Smith, S. M., Auerbach, E., Ramanna, S., Glasser, M. F., ... &
- 878 Yacoub, E. (2010). Multiplexed echo planar imaging for sub-second whole brain FMRI and
- 879 fast diffusion imaging. *PLoS ONE*, 5(12).
- 880 Formisano, E., Linden, D. E. J., Salle, F. Di, Trojano, L., Esposito, F., Sack, A. T., ... Bn, T. T.
- 881 (2002). Tracking the Mind ’ s Image in the Brain I : Time-Resolved fMRI during Visuospatial
- 882 Mental Imagery, 35, 185–194.
- 883 Freeman, J., Brouwer, G. J., Heeger, D. J., & Merriam, E. P. (2011). Orientation Decoding
- 884 Depends on Maps , Not Columns, 31(13), 4792–4804.
- 885 <https://doi.org/10.1523/JNEUROSCI.5160-10.2011>
- 886 Gentile, F., Ales, J., & Rossion, B. (2017). Being BOLD : The Neural Dynamics of Face

- 887 Perception, 139(March 2016), 120–139. <https://doi.org/10.1002/hbm.23348>
- 888 Goense, J. B., & Logothetis, N. K. (2008). Neurophysiology of the BOLD signal in awake  
889 monkeys. *Current Biology*, 18(9), 631–640.
- 890 Gribble, P. (1996). Temporal constraints on the McGurk effect, 58(3).
- 891 Haxby, J. V, Gobbini, M. I., Furey, M. L., Ishai, A., Schouten, J. L., & Pietrini, P. (2001).  
892 Distributed and Overlapping Representations of Faces and Objects in Ventral Temporal  
893 Cortex, 293(September), 2425–2431.
- 894 Haxby, J. V, Toole, A. J. O., & Jiang, F. (2005). Partially Distributed Representations of Objects  
895 and Faces in Ventral Temporal Cortex, 580–590.
- 896 Henson, R. N. A., Price, C. J., Rugg, M. D., Turner, R., & Friston, K. J. (2002). Detecting  
897 Latency Differences in Event-Related BOLD Responses : Application to Words versus  
898 Nonwords and Initial versus Repeated Face Presentations. *NeuroImage*, 97, 83–97.  
899 <https://doi.org/10.1006/nimg.2001.0940>
- 900 Husk, J. S., Bennett, P. J., & Sekuler, A. B. (2007). Inverting houses and textures : Investigating  
901 the characteristics of learned inversion effects. *Vision Research*, 47, 3350–3359.  
902 <https://doi.org/10.1016/j.visres.2007.09.017>
- 903 Johansson, G. (1973). Visual perception of biological motion and a model for its analysis.  
904 *Perception & Psychophysics*, 14(2), 201–211.
- 905 Kamitani, Y., & Tong, F. (2005). Decoding the visual and subjective contents of the human  
906 brain. *Nature Neuroscience*, 8(5), 679–685. <https://doi.org/10.1038/nn1444>
- 907 Kriegeskorte, N., & Bandettini, P. (2007). Analyzing for information , not activation , to exploit  
908 high-resolution fMRI, 38, 649–662. <https://doi.org/10.1016/j.neuroimage.2007.02.022>
- 909 Kriegeskorte, N., & Kievit, R. A. (2013). Representational geometry : integrating cognition ,  
910 computation , and the brain. *Trends in Cognitive Sciences*, 17(8), 401–412.  
911 <https://doi.org/10.1016/j.tics.2013.06.007>
- 912 Kriegeskorte, N., Mur, M., & Bandettini, P. a. (2008). Representational similarity analysis -

- 913 connecting the branches of systems neuroscience. *Frontiers in Systems Neuroscience*,  
914 2(November), 4. <https://doi.org/10.3389/neuro.06.004.2008>
- 915 Lee, Y., Turkeltaub, P., Granger, R., & Raizada, R. D. S. (2012). Categorical Speech  
916 Processing in Broca ' s Area : An fMRI Study Using Multivariate Pattern-Based Analysis,  
917 32(11), 3942–3948. <https://doi.org/10.1523/JNEUROSCI.3814-11.2012>
- 918 Lent, R., Azevedo, F. A. C., Andrade-moraes, C. H., & Pinto, A. V. O. (2012). How many  
919 neurons do you have ? Some dogmas of quantitative neuroscience under revision, 35, 1–9.  
920 <https://doi.org/10.1111/j.1460-9568.2011.07923.x>
- 921 Lewandowski, D., Kurowicka, D., & Joe, H. (2009). Generating random correlation matrices  
922 based on vines and extended onion method. *Journal of Multivariate Analysis*, 100(9),  
923 1989–2001. <https://doi.org/10.1016/j.jmva.2009.04.008>
- 924 Lewis, L. D., Setsompop, K., Rosen, B. R., & Polimeni, J. R. (2016). Fast fMRI can detect  
925 oscillatory neural activity in humans. *PNAS*, 113(43), E6679–E6685.  
926 <https://doi.org/10.1073/pnas.1608117113>
- 927 Logothetis, N. K., Pauls, J., Augath, M., Trinath, T., & Oeltermann, A. (2001).  
928 Neurophysiological investigation of the basis of the fMRI signal. *Nature*, 412(6843), 150.
- 929 Maier, A., Wilke, M., Aura, C., Zhu, C., Ye, F. Q., & Leopold, D. A. (2008). Divergence of fMRI  
930 and neural signals in V1 during perceptual suppression in the awake monkey. *Nature*  
931 *Neuroscience*, 11(10), 1193–1200. <https://doi.org/10.1038/nn.2173>
- 932 Mannion, D. J., Kersten, D. J., & Olman, C. A. (2015). Scene coherence can affect the local  
933 response to natural images in human V1. *European Journal of Neuroscience*, 42, 2895–  
934 2903. <https://doi.org/10.1111/ejn.13082>
- 935 Mannion, D. J., Mcdonald, J. S., & Clifford, C. W. G. (2009). Discrimination of the local  
936 orientation structure of spiral Glass patterns early in human visual cortex. *NeuroImage*,  
937 46(2), 511–515. <https://doi.org/10.1016/j.neuroimage.2009.01.052>
- 938 Matsumoto, D., & Ekman, P. (1988). *Japanese and Caucasian facial expressions of emotion*

- 939           *and neutral faces. els autors.*
- 940 Maxwell, S. E., Lau, M. Y., Howard, G. S., & Scott, E. (2015). Is Psychology Suffering From a  
941           Replication Crisis? *American Psychologist*, *70*(6), 487–498.
- 942 Mcguire, J. T., & Kable, J. W. (2015). Medial prefrontal cortical activity reflects dynamic re-  
943           evaluation during voluntary persistence, *18*(5). <https://doi.org/10.1038/nn.3994>
- 944 Meyers, E. M., Borzello, M., Freiwald, W. A., & Tsao, D. (2015). Intelligent Information Loss:  
945           The Coding of Facial Identity, Head Pose, and Non-Face Information in the Macaque Face  
946           Patch System. *Journal of Neuroscience*, *35*(18), 7069–7081.  
947           <https://doi.org/10.1523/JNEUROSCI.3086-14.2015>
- 948 Michel, C., Rossion, B., Han, J., Chung, C.-S., & Caldara, R. (2006). Holistic Processing Is  
949           Finely Tuned for Faces of One ' s Own Race. *Psychological Science*, *17*(7), 608–615.
- 950 Moeller, S., Yacoub, E., Olman, C. A., Auerbach, E., Strupp, J., Harel, N., & Uğurbil, K. (2010).  
951           Multiband multislice GE-EPI at 7 tesla, with 16-fold acceleration using partial parallel  
952           imaging with application to high spatial and temporal whole-brain fMRI. *Magnetic*  
953           *Resonance in Medicine*, *63*(5), 1144–1153. <https://doi.org/10.1002/mrm.22361>
- 954 Ogawa, S., Lee, T., Stepnoski, R., Chen, W., Zhu, X., & Ugurbil, K. (2000). An approach to  
955           probe some neural systems interaction by functional MRI at neural time scale down to  
956           milliseconds. *PNAS*, *97*(20), 11026–11031.
- 957 Ogawa, S., Menon, R. S., Tank, D. W., Kim, S. G., Merkle, H., Ellermann, J. M., ... Ugurbil, K.  
958           (1993). Functional brain mapping by blood oxygenation level-dependent contrast magnetic  
959           resonance imaging. A comparison of signal characteristics with a biophysical model.  
960           *Biophysical Journal*, *64*(3), 803–812. [https://doi.org/10.1016/S0006-3495\(93\)81441-3](https://doi.org/10.1016/S0006-3495(93)81441-3)
- 961 Ramon, M., Vizioli, L., Liu-shuang, J., & Rossion, B. (2015). Neural microgenesis of personally  
962           familiar face recognition. <https://doi.org/10.1073/pnas.1414929112>
- 963 Sasaki, Y., Rajimehr, R., Kim, B. W., Ekstrom, L. B., Vanduffel, W., & Tootell, R. B. H. (2006).  
964           The Radial Bias : A Different Slant on Visual Orientation Sensitivity in Human and

- 965 Nonhuman Primates, 661–670. <https://doi.org/10.1016/j.neuron.2006.07.021>
- 966 Schooler, J. W. (2014). Metascience could rescue the “ replication crisis .” *Nature*, 515, 9.
- 967 Schrater, P., Kersten, D., & Murray, S. O. (2004). Perceptual grouping and the interactions  
968 between visual cortical areas. *Neural Netw*, 17(5–6), 695–705.  
969 <https://doi.org/10.1016/j.neunet.2004.03.010>
- 970 Shadlen, M. N., & Newsome, W. T. (1998). The Variable Discharge of Cortical Neurons :  
971 Implications for Connectivity , Computation , and Information Coding, 18(10), 3870–3896.
- 972 Siero, J.C., Petridou, N., Hoogduin, H., Luijten, P.R., Ramsey, N. F. (2011). Cortical depth-  
973 dependent temporal dynamics of the BOLD response in the human brain. *Journal of*  
974 *Cerebral Bloodflow and Metabolism*, 31(10), 1999–2008.
- 975 Silva, A. C., & Koretsky, A. P. (2002). Laminar specificity of functional MRI onset times during  
976 somatosensory stimulation in rat. *PNAS*, 99(23), 15182–15187.
- 977 Smith, S. M., Miller, K. L., Moeller, S., Xu, J., Auerbach, E. J., & Woolrich, M. W. (2012).  
978 Temporally-independent functional modes of spontaneous brain activity. *PNAS*, 109(8),  
979 3131–3136. <https://doi.org/10.1073/pnas.1121329109>
- 980 Strother, S. C., Anderson, J., Hansen, L. K., Kjems, U., Kustra, R., Sidtis, J., ... Rottenberg, D.  
981 (2002). The Quantitative Evaluation of Functional Neuroimaging Experiments : The  
982 NPAIRS Data Analysis Framework, 771, 747–771. <https://doi.org/10.1006/nimg.2001.1034>
- 983 Talairach, J., & Tournoux, P. (1988). Co-planar stereotaxic atlas of the human brain. 3-  
984 Dimensional proportional system: an approach to cerebral imaging.
- 985 Troje, N. F. (2002). Decomposing biological motion: a framework for analysis and synthesis of  
986 human gait patterns. *Journal of Vision*, 2(5), 371–87. <https://doi.org/10.1167/2.5.2>
- 987 Ugurbil, K. (2014). Magnetic Resonance Imaging at Ultrahigh Fields. *IEEE TRANSACTIONS*  
988 *ON BIOMEDICAL ENGINEERING*, 61(5), 1364–1379.
- 989 Vu, A.T., Phillips, J.S., Kay, K., Phillips, M.E., Johnson, M.R., Shinkareva, S.V., Tubridy, S.,  
990 Millin, R., Grossman, M., Gureckis, T., Bhattacharyya, R., Yacoub, E. (2016). Using precise

991 word timing information improves decoding accuracy in a multiband-accelerated  
992 multimodal reading experiment. *Cognitive Neuropsychology*, 33, 265–275.

993 Welvaert, M., & Rosseel, Y. (2013). On the definition of signal-to-noise ratio and contrast-to-  
994 noise ratio for fMRI data. *PLoS ONE*, 8(11). <https://doi.org/10.1371/journal.pone.0077089>

995 Westfall, P. H., & Young, S. S. (1993). *Resampling-based multiple testing: Examples and*  
996 *methods for p-value adjustment* (Vol 279). John Wiley & Sons.

997 Westfall, P. . H. ., Young, S. . S. ., & Wright, S. . P. (1993). On Adjusting P-Values for Multiplicity  
998 Published by : International Biometric Society Stable URL :  
999 <http://www.jstor.org/stable/2532216> On Adjusting P-Values for Multiplicity. *Biometrics*,  
1000 49(3), 941–945.

1001 Yen, C. C., Papoti, D., & Silva, A. C. (2018). Investigating the spatiotemporal characteristics of  
1002 the deoxyhemoglobin- related and deoxyhemoglobin-unrelated functional hemodynamic  
1003 response across cortical layers in awake marmosets. *NeuroImage*, 164(March 2017), 121–  
1004 130. <https://doi.org/10.1016/j.neuroimage.2017.03.005>

1005
